# Supplementary material for: Iron limitation of kelp growth may prevent ocean afforestation
Source: PubMed Central journal article supplement (PMC10244339; doi:10.1038/s42003-023-04962-4), 2023-06-06
Supplement: 42003_2023_4962_MOESM2_ESM.pdf [file 42003_2023_4962_MOESM2_ESM.pdf]

## Description of Additional Supplementary Files

**File name:** Supplementary Data 1

**Description:** ANOVA Test Results.

**File name:** Supplementary Data 2

**Description:** Tukey's HSD Multiple Comparison Results.

**File name:** Supplementary Data 3

**Description:** The source data behind the graphs in the paper.
